# Supplementary material for: Molecular Detection and Characterization of the First Cowpox Virus Isolate Derived from a Bank Vole
Source: MDPI journal article supplement (doi:10.3390/v11111075), 2019-11-18
Supplement: s1 [file s1]

**Supplementary Table 1.** List of used Orthopox virus sequences and classification into species and clades: *Ectromelia virus* (ECTV), *Monkeypox virus* (MKXV), New World Orthopoxvirus (New World OPV), *Variola virus* (VARV), *Vaccinia virus* (VACV), *Taterapox virus* (TATV), Cowpox virus like 1 (CPXV-like 1), Cowpox virus like 2 (CPXV-like 2), Cowpox virus vaccinia virus like (VACV like), and Cowpox virus variola virus like (VARV-like) according to Franke et al.,2017 [1]. Additional clades introduced due to phylogenetic tree positions includes Akhmeta virus (AKMV), and Cowpox virus Ectromelia virus like (ECTV-like).

| Accession number | Name                                                   | Species / Clade |
|------------------|--------------------------------------------------------|-----------------|
| AF012825         | Ectromelia virus strain Moscow                         | ECTV            |
| JQ410350         | Ectromelia virus ERPV culture-collection ATCC:VR-1431  | ECTV            |
| KJ563295         | Ectromelia virus Naval                                 | ECTV            |
| MH816996         | Orthopoxvirus Abatino                                  | CPXV ECTV-like  |
| DQ011154         | Monkeypox virus strain Congo_2003_358                  | MKXV            |
| DQ011155         | Monkeypox virus strain Zaire_1979-005                  | MKXV            |
| NC_027213        | Raccoonpox virus                                       | New World OPV   |
| NC_031033        | Volepox virus strain CA                                | New World OPV   |
| NC_031038        | Skunkpox virus strain WA                               | New World OPV   |
| DQ437584         | Variola virus strain Germany 1958 Heidelberg           | VARV            |
| DQ441429         | Variola virus strain Japan 1946 (Yamada MS-2(A) Tokyo) | VARV            |
| KX061501         | Vaccinia virus strain Lister                           | VACV            |
| DQ439815         | Vaccinia virus strain DUKE                             | VACV            |
| DQ792504         | Horsepox virus isolate MNR-76                          | VACV            |
| NC_008291        | Taterapox virus                                        | TATV            |
| KC813491         | Cowpox virus strain BeaBer04/1                         | CPXV-like 1     |
| LT896731         | Cowpox virus isolate Ger/2015/Cat4 genome assembly     | CPXV-like 1     |
| LT993228         | Cowpox virus isolate Ger/2017/common vole FMEimka      | CPXV-like 1     |
| LT993232         | Cowpox virus isolate Ger/2015/Human2                   | CPXV-like 1     |
| AF482758         | Cowpox virus strain Brighton Red                       | CPXV-like 2     |
| DQ437593         | Cowpox virus strain Germany 91-3                       | CPXV-like 2     |

|          |                                       |                |
|----------|---------------------------------------|----------------|
| LN864566 | Cowpox virus FM2292                   | CPXV-like 2    |
| LT896722 | Cowpox virus isolate Ger/2007/Vole    | CPXV-like 2    |
| HQ407377 | Cowpox virus strain Austria 1999      | CPXV VACV-like |
| HQ420893 | Cowpox virus strain Finland_2000_MAN  | CPXV VACV-like |
| KC813512 | Cowpox virus strain HumKre08/1        | CPXV VARV-like |
| LN864565 | Cowpox virus Ratpox09                 | CPXV VARV-like |
| LT896721 | Cowpox virus isolate Ger 2010 MKY     | CPXV ECTV-like |
| MH607141 | Akhmeta virus isolate Akhmeta_2013-88 | AKMV           |
| MH607142 | Akhmeta virus isolate Akhmeta_2013-85 | AKMV           |
| MH607143 | Akhmeta virus isolate Vani_2010       | AKMV           |

[1] Franke A, Pfaff F, Jenckel M, Hoffmann B, Hoper D, Antwerpen M, Meyer H, Beer M, Hoffmann D (2017) Classification of Cowpox Viruses into Several Distinct Clades and Identification of a Novel Lineage. *Viruses* 9 (6). doi:10.3390/v9060142

**Supplementary Table 2.** Individual information on bank voles (*M. glareolus*) tested positive for orthopoxvirus genome in this study. Trapping areas indicate the area of capture shown in Fig.1. Organ material from the bank vole written in bold was used to generate CPXV GerMygEK 938/17.

| Number          | Date of trapping  | Season        | Species                    | Sex           | Reproductive Status | weight (g) | Head-to-torso-length (cm) | Tail-length (cm) | Ct-value  |
|-----------------|-------------------|---------------|----------------------------|---------------|---------------------|------------|---------------------------|------------------|-----------|
| KS17/920        | 20.04.2017        | Spring        | <i>M. glareolus</i>        | male          |                     | 16         | 7.5                       | 3.5              | 29        |
| KS17/934        | 21.04.2017        | Spring        | <i>M. glareolus</i>        | male          | descended testis    | 30         | 8.5                       | 4                | 26        |
| <b>KS17/938</b> | <b>21.04.2017</b> | <b>Spring</b> | <b><i>M. glareolus</i></b> | <b>female</b> |                     | <b>15</b>  | <b>7.5</b>                | <b>3.5</b>       | <b>21</b> |
| KS17/973        | 10.05.2017        | Spring        | <i>M. glareolus</i>        | female        |                     | 17         | 8                         | 3                | 34        |
| KS17/1472       | 17.08.2017        | Summer        | <i>M. glareolus</i>        | male          |                     | 7          | 7                         | 4                | 38        |
